# Supplementary material for: Influenza vaccination, inverse care and homelessness: cross-sectional survey of eligibility and uptake during the 2011/12 season in London
Source: PubMed Central journal article supplement (PMC3906096; doi:10.1186/1471-2458-14-44), 2014-01-16
Supplement: 1471-2458-14-44-S1.pdf [file 1471-2458-14-44-S1.pdf]

## TB Reach/Find & Treat Anonymous Health Survey

### A) Demographics

#### 1 Sex

- Male  
 Female

#### 2 Age

- 16-24  
 25-34  
 35-44  
 45-54  
 55-64  
 >65

#### 3 Place of birth

- UK  
 E Europe  
 S Asia  
 Africa  
 Other

#### 4 Time since arrival UK

- UK Born  
 <1 year  
 1-5 years  
 >5 years

### B) Health

#### 5 Do you have any of the following health problems? (mark any)

- 5 Asthma  
 6 I use an inhaler  
 7 Chronic breathing problems  
 8 Heart problems  
 9 Stroke  
 10 Diabetes  
 11 Hepatitis  
 12 HIV  
 13 I was treated previously for TB  
 14 Epilepsy  
 15 Mobility problems

#### 6 Do you have any of these symptoms at the moment? (mark any)

- 16 Weight loss for no reason  
 17 Coughing for more than 3 weeks  
 18 Fever or night sweats  
 19 Coughing up blood  
 20 Shortness of breath  
 21 None of these symptoms

#### 7 Are you registered with a GP? (mark one)

- 22 Yes - Local (easy to travel to)  
 23 Yes - but not local (hard to travel to)  
 24 No

#### 8 When did you last see a GP? (mark one)

- 25 <1 year  
 26 <2 years  
 27 Should have done but missed appointment  
 28 Don't know/remember

#### 9 Have you attended A&E in the last year? (mark one)

- 29 No  30 Once  31 Twice  32 3 times  33 >3 times  34 Don't know/remember

#### 10 Have you been admitted to hospital in the last year? (mark one)

- 35 No  36 Once  37 Twice  38 3 times  39 >3 times  40 Don't know/remember

#### 11 Have you missed any hospital appointments in the last year? (mark one)

- 41 No  42 Once  43 Twice  44 3 times  45 >3 times  46 Don't know/remember

### C) Blood Born Viruses

#### 12 Have you been vaccinated against Hepatitis B? (mark one)

- 47 Never  48 Once  49 Twice  50 3 times  51 >3 times  52 Don't know/remember

#### 13 Have you been tested for HIV? (mark one)

- 53 Yes  54 No  55 Don't know/remember

#### 14 Have you been tested for Hepatitis C? (mark one)

- 56 Yes  57 No  58 Don't know/remember

### D) Flu Vaccination

15 Did you know there is a seasonal vaccine to prevent influenza?

- 1 Yes  
 2 No  
 3 Don't know/remember

16 If YES where did you find out about flu vaccine?

- 1 Hostel  
 2 GP  
 3 Hospital  
 4 Pharmacist  
 5 Drug service  
 6 Other

17 Have you ever been vaccinated against flu?

- 7 Yes - but not last winter  
 8 Yes - last winter  
 9 Tried to get vaccinated but was refused  
 10 No  
 11 Don't know / remember

18 If YES where did you get flu vaccine? (mark any)

- 4 Hostel  
 5 GP  
 6 Hospital  
 7 Pharmacist  
 8 Drug service  
 9 Other

19 Would you get vaccinated against flu if we could offer it?

- 10 Yes  11 No

### E) Lifestyle

20 Do you get any state benefits? (mark one)

- 12 Yes  13 No (not applied)  14 No (refused)  15 Not entitled

21 Do you smoke cigarettes? (mark one)

- 16 Yes  17 Yes (want help to stop)  18 No

22 Do you drink alcohol everyday?

- 19 Yes  20 No

23 Do you drink alcohol soon after waking?

- 21 Yes  22 No

24 Have you ever slept rough? (mark one)

- 23 Yes  24 No

25 Have you ever lived in a hostel? (mark one)

- 25 Yes  26 No

26 Have you ever used a day centre? (mark one)

- 27 Yes  28 No

27 Have you been in prison before? (mark one)

- 29 Yes  30 No

28 Have you used heroin? (mark any)

- 31 Previously injected  
 32 Previously smoked  
 33 Currently inject  
 34 Currently smoke  
 35 Never

29 Have you used crack/cocaine? (mark any)

- 36 Previously injected  
 37 Previously smoked  
 38 Currently inject  
 39 Currently smoke  
 40 Never

30 Have you been prescribed methadone or subutex? (mark one)

- 41 Never  42 Previously  43 Currently

Cepheid Study? (mark one)

- 44 Yes - MXU number \_\_\_\_\_  45 No

Referred from MXU? (mark one)

- 46 Yes - MXU number \_\_\_\_\_  47 No

LTBI Study? (mark one)

- 48 Yes - Study number \_\_\_\_\_  49 No

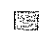

10000

By Placing a tick in one box in each group below, please indicate which statement best describes you own health state today.

**MOBILITY**

- I have no problem in walking about
- I have some problems in walking about
- I am confined to bed

**SELF-CARE**

- I have no problems with self-care
- I have some problems washing or dressing myself
- I am unable to wash or dress myself

**USUAL ACTIVITIES** (e.g. Work, Study, Housework, Family or Leisure activities)

- I have no problems with performing my usual activities
- I have some problems with performing my usual activities
- I am unable to perform my usual activities

**PAIN/DISCOMFORT**

- I have no pain or discomfort
- I have moderate pain or discomfort
- I have extreme pain or discomfort

**ANXIETY/DEPRESSION**

- I am not anxious or depressed
- I am moderatley anxious or depressed
- I am extremely anxious or depressed

10000

To help people say how good or bad a health state is, we have a scale on which the best state you can imagine is 100 and the worst state you can imagine is marked 0.

We would like you to indicate on this scale how good or bad your own health is today, in your opinion. Please do this by marking one of the boxes in the scale below to indicate how good or bad your health is today

Your own  
health state  
today

|     |                          |
|-----|--------------------------|
| 100 | <input type="checkbox"/> |
| 95  | <input type="checkbox"/> |
| 90  | <input type="checkbox"/> |
| 85  | <input type="checkbox"/> |
| 80  | <input type="checkbox"/> |
| 75  | <input type="checkbox"/> |
| 70  | <input type="checkbox"/> |
| 65  | <input type="checkbox"/> |
| 60  | <input type="checkbox"/> |
| 55  | <input type="checkbox"/> |
| 50  | <input type="checkbox"/> |
| 45  | <input type="checkbox"/> |
| 40  | <input type="checkbox"/> |
| 35  | <input type="checkbox"/> |
| 30  | <input type="checkbox"/> |
| 25  | <input type="checkbox"/> |
| 20  | <input type="checkbox"/> |
| 15  | <input type="checkbox"/> |
| 10  | <input type="checkbox"/> |
| 5   | <input type="checkbox"/> |
| 0   | <input type="checkbox"/> |

## Contact questions

Do you have a mobile phone? YES / NO

Do you have an email address? YES / NO

Are you on facebook? YES / NO

Are you on Twitter? YES / NO
